# Supplementary material for: ITCH-dependent proteasomal degradation of c-FLIP induced by the anti-HER3 antibody 9F7-F11 promotes DR5/caspase 8-mediated apoptosis of tumor cells
Source: PubMed Central journal article supplement (PMC6708219; doi:10.1186/s12964-019-0413-8), 2019-08-23
Supplement: 12964_2019_413_MOESM1_ESM.pdf [file 12964_2019_413_MOESM1_ESM.pdf]

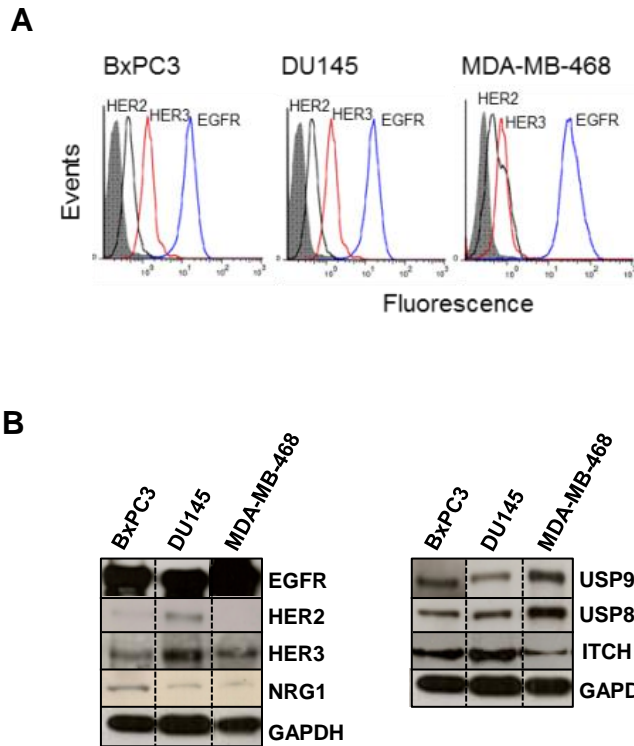

**Figure S1.** (a) Flow cytometry analysis of EGFR, HER2 and HER3 expression at the membrane of BxPC3, DU145 and MDA-MB-468 cells. (b) Western blot analysis of receptor and NRG1 expression, and USP8, USP9 and ITCH expression in whole cell lysates of BxPC3, DU145 and MDA-MB-468 cell lines.

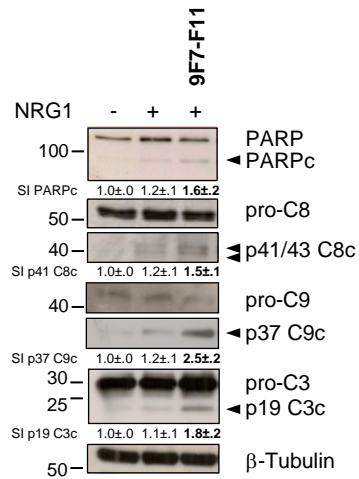

**Figure S2.** 9F7-F11-induced apoptosis of tumor cells occurs through activation of caspase-8/9/3 and PARP cleavage. BxPC3 cells were incubated with the anti-HER3 antibody 9F7-F11, and/or NRG1 for 60h. Total proteins extracts were analyzed by western blotting for caspase-8, -9 and -3, and PARP cleavage. Quantification of signal intensity (SI) with ImageJ software is indicated below the images (relative to untreated control measured as 1.0 ± 0.0). Significant increase or decrease of the densitometry, compared to control, is indicated in bold.

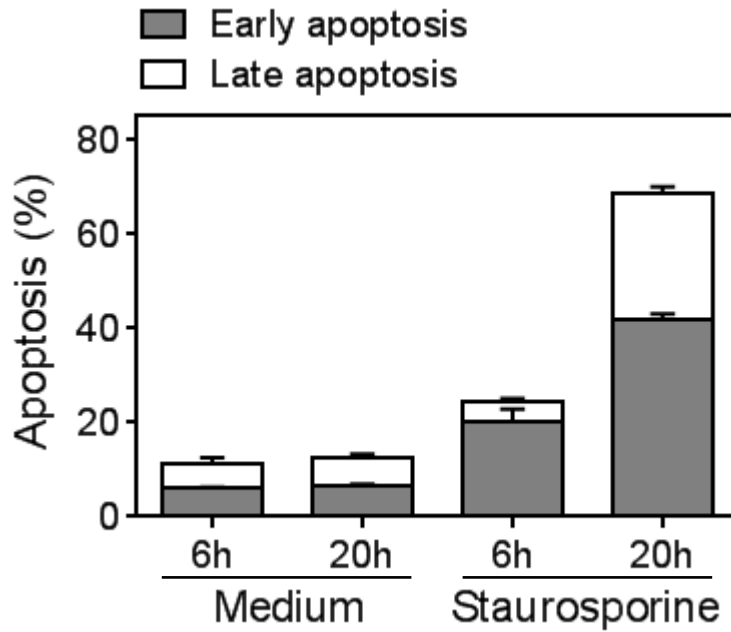

**Figure S3.** BxPC3 cells were treated with 300nM Staurosporine, as apoptosis positive control. Apoptosis was measured at 6h and 20h by flow cytometry after cell labelling with Annexin V/7-AAD.
